# Supplementary material for: Efficacy of faecal microbiota transplantation for patients with irritable bowel syndrome in a randomised, double-blind, placebo-controlled study
Source: PubMed Central journal article supplement — Gut. 2019 Dec 18;69(5):859–67. doi: 10.1136/gutjnl-2019-319630 (PMC7229896; doi:10.1136/gutjnl-2019-319630), 2019-12-18
Supplement: gutjnl-2019-319630supp001.pdf [file gutjnl-2019-319630supp001.pdf]

Supplementary Table 1. Dietary supplements used regularly by the donor.

| Dietary supplement                      | Contents                                                                   | Dosage           |
|-----------------------------------------|----------------------------------------------------------------------------|------------------|
| Whey protein                            | 22-g protein, 2.4-g fat, 0.15-g fibre per 30 g                             | 120 g daily      |
| Maca ( <i>Lepidium meyenii</i> ) root   | Proteins, fibre, vitamin C, vitamin B6, copper, iron, potassium, magnesium | 500 mg daily     |
| Tribulus ( <i>Tribulus terrestris</i> ) | Tribulus                                                                   | 1 g daily        |
| Preworkout                              | Protein, creatine, vitamin C, vitamin E, vitamin B6, vitamin B12           | 5 times a week   |
| BCAA after training                     | Protein                                                                    | 5 times a week   |
| Creatine monohydrate                    | Creatine                                                                   | 5 g daily        |
| Glutamine                               | Glutamine                                                                  | 5 g daily        |
| Lakerol YUP Mix                         | 30-g fibre                                                                 | 1 daily          |
| Multivitamin capsules                   | Multivitamins                                                              | 2 capsules daily |
| Vitamin C                               | Vitamin C                                                                  | 2 g daily        |
| Vitamin D                               | Vitamin D                                                                  | 1 capsule daily  |
| Zinc                                    | Zinc                                                                       | 30 g daily       |
| Magnesium                               | Magnesium                                                                  | 500 mg daily     |
| Aerius (antihistamine)                  | Desloratadine                                                              | 5 mg daily       |

BCAA, branched-chain amino acids
