# Supplementary material for: Efficacy of faecal microbiota transplantation for patients with irritable bowel syndrome in a randomised, double-blind, placebo-controlled study
Source: PubMed Central journal article supplement — Gut. 2019 Dec 18;69(5):859–67. doi: 10.1136/gutjnl-2019-319630 (PMC7229896; doi:10.1136/gutjnl-2019-319630), 2019-12-18
Supplement: gutjnl-2019-319630supp002.pdf [file gutjnl-2019-319630supp002.pdf]

Supplementary Table 2. Differences in responses between IBS subtypes following FMT.

| Time     | Group    | IBS-D | IBS-C | IBS-M | p-values |
|----------|----------|-------|-------|-------|----------|
| 2 weeks  | Placebo  | 40.0  | 41.7  | 42.8  | 0.909    |
|          | 30-g FMT | 45.5  | 63.2  | 53.8  | 0.054    |
|          | 60-g FMT | 71.4  | 65    | 78.6  | 0.088    |
| 1 month  | Placebo  | 0     | 21.4  | 14.3  | <0.0001  |
|          | 30-g FMT | 54.5  | 63.2  | 46.2  | 0.054    |
|          | 60-g FMT | 81.0  | 75.0  | 71.4  | 0.253    |
| 3 months | Placebo  | 0     | 21.4  | 14.3  | <0.0001  |
|          | 30-g FMT | 68.2  | 68.4  | 61.5  | 0.586    |
|          | 60-g FMT | 76.2  | 80.0  | 85.7  | 0.197    |

Data are percentage values.
