# Supplementary material for: Efficacy of faecal microbiota transplantation for patients with irritable bowel syndrome in a randomised, double-blind, placebo-controlled study
Source: PubMed Central journal article supplement — Gut. 2019 Dec 18;69(5):859–67. doi: 10.1136/gutjnl-2019-319630 (PMC7229896; doi:10.1136/gutjnl-2019-319630), 2019-12-18
Supplement: gutjnl-2019-319630supp003.pdf [file gutjnl-2019-319630supp003.pdf]

Supplementary Table 3. Birmingham IBS-S total scores and scores in the three domains of this scale in placebo and FMT-treated patients.

| Time     | Group    | Total score | Pain       | Diarrhoea  | Constipation |
|----------|----------|-------------|------------|------------|--------------|
| 0        | Placebo  | 23.2±8.1    | 7.3±3.2    | 7.8±4.9    | 7.7±3.2      |
|          | 30-g FMT | 26.5±6.0    | 8.4±2.0    | 10.5±4.3** | 7.5±3.4      |
|          | 60-g FMT | 25.2±6.8**  | 8.1±2.7    | 9.0±4.7    | 8.2±3.2      |
| 2 weeks  | Placebo  | 19.6±10.6   | 6.2±4.2    | 6.0±6.0    | 7.4±3.6      |
|          | 30-g FMT | 20.4±8.1    | 7.3±3.3    | 6.8±4.5    | 5.5±3.6*     |
|          | 60-g FMT | 16.6±7.8    | 4.6±2.8*** | 5.9±4.7    | 6.2±4.1      |
| 1 month  | Placebo  | 21.3±8.2    | 7.2±3.5    | 6.5±4.9    | 7.5±3.7      |
|          | 30-g FMT | 18.9±8.5    | 6.0±3.3    | 6.8±4.5    | 5.6±3.5*     |
|          | 60-g FMT | 15.8±8.6*** | 5.0±3.1**  | 4.9±4.0    | 6.0±4.8*     |
| 3 months | Placebo  | 19.8±9.7    | 6.6±3.9    | 6.2±5.3    | 7.0±4.5      |
|          | 30-g FMT | 15.3±7.0*   | 4.6±2.8**  | 4.9±3.0    | 5.7±3.8      |
|          | 60-g FMT | 14.6±7.2**  | 4.4±3.0**  | 4.2±2.9*   | 5.7±3.1      |

Data are mean±SD values.

\*, p<0.05; \*\*, p<0.01; \*\*\*, p<0.001 compared to placebo. \*\*\*, p<0.001 compared to 30-g FMT.
