# Supplementary material for: Efficacy of faecal microbiota transplantation for patients with irritable bowel syndrome in a randomised, double-blind, placebo-controlled study
Source: PubMed Central journal article supplement — Gut. 2019 Dec 18;69(5):859–67. doi: 10.1136/gutjnl-2019-319630 (PMC7229896; doi:10.1136/gutjnl-2019-319630), 2019-12-18
Supplement: gutjnl-2019-319630supp004.pdf [file gutjnl-2019-319630supp004.pdf]

Supplementary Table 4. SF-NDI total score and scores on the five subscales of this scale in placebo and FMT-treated patients.

| Time     | Group    | Total score  | 1          | 2         | 3          | 4         | 5       |
|----------|----------|--------------|------------|-----------|------------|-----------|---------|
| 0        | Placebo  | 29.1±6.2     | 6.2±1.6    | 5.5±1.7   | 6.7±1.7    | 5.3±1.9   | 5.3±1.7 |
|          | 30-g FMT | 30.1±7.2     | 5.3±1.9*   | 5.8±2.0   | 7.2±2.0    | 5.4±1.8   | 5.7±2.3 |
|          | 60-g FMT | 30.5±8.3     | 6.4±1.9*   | 5.8±2.3   | 7.2±1.8    | 5.2±2.0   | 5.6±2.1 |
| 2 weeks  | Placebo  | 27.5±7.8     | 5.7±2.0    | 5.3±2.2   | 6.2±2.1    | 4.9±1.8   | 5.2±2.3 |
|          | 30-g FMT | 27.0±8.9     | 5.3±1.9    | 5.3±2.3   | 6.4±2.2    | 4.9±1.9   | 5.3±2.3 |
|          | 60-g FMT | 25.6±9.8     | 5.3±2.0    | 4.9±2.4   | 6.0±2.4    | 4.6±2.2   | 4.9±2.6 |
| 1 month  | Placebo  | 28.5±6.7     | 6.0±1.7    | 4.9±2.6   | 6.6±1.9    | 5.1±1.9   | 5.3±1.9 |
|          | 30-g FMT | 24.6±8.6*    | 5.3±1.9    | 5.0±2.0   | 6.5±2.2    | 4.7±1.7   | 5.0±2.2 |
|          | 60-g FMT | 24.1±9.8*    | 5.0±2.1*   | 4.7±2.4   | 5.4±2.3*,* | 4.4±2.0   | 4.7±2.6 |
| 3 months | Placebo  | 29.5±7.0     | 6.2±1.5    | 5.6±1.8   | 6.8±2.0    | 5.3±2.0   | 5.5±2.1 |
|          | 30-g FMT | 24.8±8.8*    | 5.0±1.9**  | 4.5±2.1*  | 6.1±2.1    | 4.4±1.7*  | 4.6±2.1 |
|          | 60-g FMT | 22.6±9.3**** | 4.7±2.1*** | 4.2±2.1** | 5.2±2.3*** | 4.1±1.9** | 4.6±2.5 |

Data are mean±SD values.

SF-NDI subscales: 1, tension; 2, interference with daily activities; 3, disruption to eating/drinking; 4, knowledge about/control over disease symptoms; 5, interference with work/study. \*, p<0.05; \*\*, p<0.01; \*\*\*, p<0.001; \*\*\*\*, p<0.0001 compared to Placebo. \*, p<0.05 compared to 30-g FMT.
