# Supplementary material for: Efficacy of faecal microbiota transplantation for patients with irritable bowel syndrome in a randomised, double-blind, placebo-controlled study
Source: PubMed Central journal article supplement — Gut. 2019 Dec 18;69(5):859–67. doi: 10.1136/gutjnl-2019-319630 (PMC7229896; doi:10.1136/gutjnl-2019-319630), 2019-12-18
Supplement: gutjnl-2019-319630supp005.pdf [file gutjnl-2019-319630supp005.pdf]

Supplementary Table 5. Significant clinical improvements abdominal symptoms, fatigue and quality of life in patients with IBS following FMT.

| Time     | Group    | IBS-SSS score | FAS score | IBS-QoL score |
|----------|----------|---------------|-----------|---------------|
| 2 weeks  | Placebo  | 10.9          | 16.4      | 30.9          |
|          | 30-g FMT | 20.4          | 40.7      | 31.5          |
|          | 60-g FMT | 38.2          | 36.4      | 40            |
| 1 month  | Placebo  | 7.3           | 16.4      | 21.8          |
|          | 30-g FMT | 25.9          | 42.6      | 48.2          |
|          | 60-g FMT | 32.7          | 47.3      | 38.2          |
| 3 months | Placebo  | 5.5           | 21.8      | 7.3           |
|          | 30-g FMT | 35.2          | 53.7      | 61.1          |
|          | 60-g FMT | 47.3          | 52.7      | 58.2          |

Data are percentage values.
