# Supplementary material for: Efficacy of faecal microbiota transplantation for patients with irritable bowel syndrome in a randomised, double-blind, placebo-controlled study
Source: PubMed Central journal article supplement — Gut. 2019 Dec 18;69(5):859–67. doi: 10.1136/gutjnl-2019-319630 (PMC7229896; doi:10.1136/gutjnl-2019-319630), 2019-12-18
Supplement: gutjnl-2019-319630supp006.pdf [file gutjnl-2019-319630supp006.pdf]

Table 10. Intestinal bacterial profiles before and after FMT in the placebo, 30-g FMT and 60-g FMT groups.

| Bacteria                                                         | Placebo      |              | 30-g FMT             |                       | 60-g FMT             |                       |
|------------------------------------------------------------------|--------------|--------------|----------------------|-----------------------|----------------------|-----------------------|
|                                                                  | Before       | After        | Before               | After                 | Before               | After                 |
| Actinobacteria                                                   | -0.235±0.763 | -0.365±0.768 | -0.250±0.954         | -0.375±0.838          | -0.250±0.719         | -0.2350±0.636         |
| Actinomycetales                                                  | 0.118±0.382  | -0.212±0.536 | 0.175±0.594          | 0.100±0.496           | 0.068±0.255          | 0.145±0.412           |
| <i>Bifidobacterium</i> spp.                                      | -0.020±0.607 | -0.154±0.539 | 0.025±0.660          | -0.075±0.572          | -0.045±0.526         | -0.063±0.433          |
| <i>Alistipes</i> spp.                                            | -0.863±0.895 | -0.885±0.900 | <b>-0.872±0.864</b>  | <b>-0.513±0.756*</b>  | <b>-0.943±0.873</b>  | <b>-0.429±0.608**</b> |
| <i>Alistipes onderdonkii</i>                                     | -0.667±0.792 | -0.615±0.718 | -0.650±0.834         | -0.550±0.783          | -0.523±0.699         | -0.354±0.565          |
| <i>Bacteroides fragilis</i>                                      | -0.255±0.689 | -0.212±0.637 | 0.175±0.501          | 0.050±0.221           | 0.159±0.480          | 0.104±0.371           |
| <i>Bacteroides</i> and <i>Prevotella</i> spp.                    | -0.980±1.157 | -0.885±1.182 | <b>-0.718±1.0325</b> | <b>-0.3033±0.621*</b> | -1.091±1.996         | -0.708±0.967          |
| <i>Bacteroides stercoris</i>                                     | -0.137±0.448 | -0.154±0.415 | 0.025±0.158          | 0.100±0.304           | 0.023±0.151          | 0.146±0.357           |
| <i>Bacteroides zoogloeiformans</i>                               | 0.078±0.272  | 0.038±0.194  | 0.025±0.158          | 0±0                   | 0.091±0.291          | 0.083±0.347           |
| <i>Parabacteroides johnsonii</i>                                 | 0.039±0.196  | 0.077±0.269  | 0.050±0.221          | 0.100±0.304           | 0.045±0.302          | 0.021±0.144           |
| <i>Parabacteroides</i> spp.                                      | -0.451±0.642 | -0.327±0.706 | -0.425±0.747         | -0.225±0.480          | -0.455±0.504         | -0.313±0.468          |
| Firmicutes                                                       | -0.431±0.575 | -0.385±0.566 | -0.325±0.526         | -0.400±0.591          | <b>-0.8629±0.646</b> | <b>-0.400±0.445*</b>  |
| Bacilli                                                          | 0.235±1.124  | 0.192±0.991  | 0.271±1.132          | 0.150±1.001           | 0.205±1.047          | 0.042±0.824           |
| <i>Catenibacterium mitsuokai</i>                                 | 0.000±0.400  | 0.135±0.525  | 0.050±0.289          | 0.100±0.441           | 0.023±0.151          | 0.104±0.515           |
| Clostridia                                                       | -0.020±0.244 | -0.077±0.269 | -0.025±0.276         | 0.000±0.036           | 0.068±0.255          | 0.021±0.252           |
| <i>Clostridium</i> spp.                                          | 0.039±0.196  | 0.038±0.194  | 0±0                  | 0.050±0.316           | 0.223±0.151          | 0.063±0.245           |
| <i>Dialister invisus</i>                                         | 0.118±0.381  | -0.173±0.474 | 0.158±0.3675         | 0.026±0.160           | 0.091±0.362          | 0.146±0.505           |
| <i>Dialister invisus</i> and <i>Megasphaera micronuciformis</i>  | 0.059±0.238  | 0.173±0.474  | 0.125±0.335          | 0.025±0.158           | 0.068±0.034          | 0.104±0.308           |
| <i>Dorea</i> spp.                                                | 0.569±0.700  | 0.500±0.700  | 0.625±0.628          | 0.667±0.806           | <b>0.657±0.725</b>   | <b>0.429±0.655*</b>   |
| <i>Eubacterium bifforme</i>                                      | 0.412±0.753  | 0.269±0.598  | 0.275±0.640          | 0.400±0.633           | 0.477±0.791          | 0.563±0.769           |
| <i>Eubacterium hallii</i>                                        | 0.804±0.939  | 0.673±0.879  | <b>0.667±0.738</b>   | <b>0.436±0.598*</b>   | 0.886±0.993          | 0.979±1.021           |
| <i>Eubacterium rectale</i>                                       | 0.078±0.337  | 0.058±0.235  | 0.050±0.221          | 0.025±0.158           | 0.068±0.255          | 0.042±0.202           |
| <i>Eubacterium siraeum</i>                                       | -1.412±0.963 | -1.288±0.161 | -1.475±1.086         | -1.200±1.265          | -1.295±0.930         | -1.208±0.988          |
| <i>Faecalibacterium prausnitzii</i>                              | -0.431±0.671 | -0.500±0.804 | -0.550±0.745         | -0.500±0.599          | -0.568±0.759         | -0.521±0.825          |
| Lachnospiraceae                                                  | 0.196±0.566  | 0.269±0.630  | 0.325±0.730          | 0.275±0.640           | 0.205±0.553          | 0.125±0.489           |
| <i>Lactobacillus ruminis</i> and <i>Pediococcus acidilactici</i> | 0.059±0.311  | 0.077±0.334  | 0±0                  | 0.025±0.158           | 0.021±0.146          | 0.188±0.571           |
| <i>Lactobacillus</i> spp.                                        | 0.353±0.594  | 0.269±0.528  | 0.325±0.616          | 0.475±0.680           | 0.500±0.731          | 0.583±0.679           |
| <i>Phascolarctobacterium</i> spp.                                | 0.078±0.337  | 0.077±0.337  | 0.125±0.404          | 0.075±0.350           | 0.091±0.362          | 0.083±0.347           |

|                                                                                                     |              |              |              |              |                    |                                 |
|-----------------------------------------------------------------------------------------------------|--------------|--------------|--------------|--------------|--------------------|---------------------------------|
| <i>Ruminococcus albus</i> and<br><i>Ruminococcus bromii</i>                                         | 0.353±0.658  | 0.404±0.721  | 0.325±0.616  | 0.450±0.749  | 0.205±0.553        | 0.271±0.574                     |
| <i>Ruminococcus gnavus</i>                                                                          | 0.431±0.878  | 0.577±0.878  | 0.450±0.815  | 0.325±0.764  | 0.364±0.810        | 0.250±0.636                     |
| <i>Streptococcus agalactiae</i> and<br><i>Eubacterium rectale</i>                                   | 0.157±0.367  | 0.250±0.480  | 0.110±0.304  | 0.125±0.345  | 0.267±0.495        | 0.083±0.279                     |
| <i>Streptococcus salivarius</i> subsp.<br><i>thermophilus</i> and<br><i>Streptococcus sanguinis</i> | 0.412±0.606  | 0.346±0.556  | 0.675±0.888  | 0.475±0.751  | 0.455±0.504        | 0.292±0.459                     |
| <i>Streptococcus salivarius</i> subsp.<br><i>thermophilus</i>                                       | 0.628±0.871  | 0.577±0.915  | 0.500±0.934  | 0.600±0.928  | 0.523±0.821        | 0.604±0.844                     |
| <i>Streptococcus</i> spp.                                                                           | 0.471±0.833  | 0.423±0.696  | 0.400±0.709  | 0.450±0.815  | 0.444±0.841        | 0.396±0.610                     |
| <i>Veillonella</i> spp.                                                                             | -0.177±0.518 | -0.173±0.648 | -0.175±0.385 | -0.150±0.534 | -0.273±0.544       | -0.208±0.504                    |
| Proteobacteria                                                                                      | 0.294±0.576  | 0.289±0.499  | 0.275±0.599  | 0.325±0.616  | 0.717±0.750        | 0.583±0.498                     |
| <i>Shigella</i> and<br><i>Escherichia</i> spp.                                                      | -0.275±0.940 | -0.212±0.893 | -0.200±0.853 | -0.335±0.920 | -0.151±1.077       | -0.188±0.790                    |
| <i>Mycoplasma hominis</i>                                                                           | -0.451±0.503 | -0.404±0.496 | -0.450±0.504 | -0.450±0.503 | -0.500±0.506       | -0.479±0.505                    |
| <i>Akkermansia muciniphila</i>                                                                      | 0.471±0.644  | 0.365±0.627  | 0.450±0.714  | 0.650±0.802  | <b>0.371±0.770</b> | <b>0.914±0.951<sup>**</sup></b> |

Data are mean±SD values.

\* p<0.01; \*\* p<0.05 compared to the baseline values.

Values in boldface italics are those who were statistically significant
