# Supplementary figures and images for: Efficacy of faecal microbiota transplantation for patients with irritable bowel syndrome in a randomised, double-blind, placebo-controlled study
Source: PubMed Central journal article supplement — Gut. 2019 Dec 18;69(5):859–67. doi: 10.1136/gutjnl-2019-319630 (PMC7229896; doi:10.1136/gutjnl-2019-319630), 2019-12-18

**Eubacterium bifforme**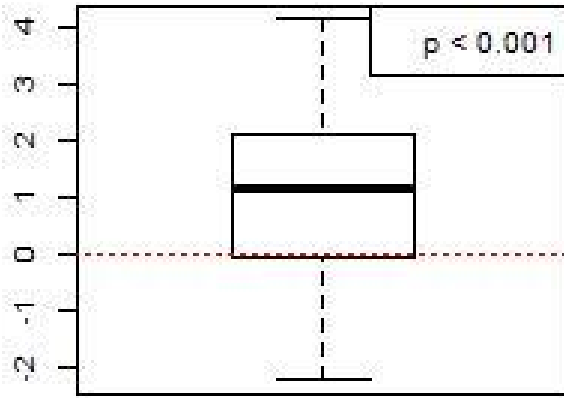**Lactobacillus spp.**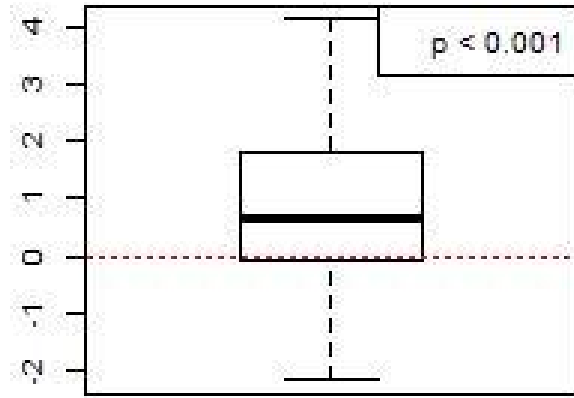**Alistipes**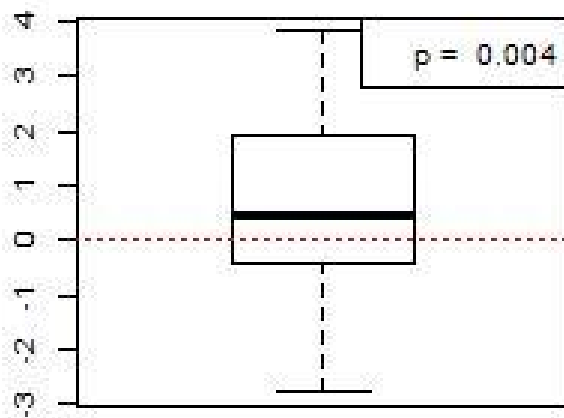**Bacteroides spp.**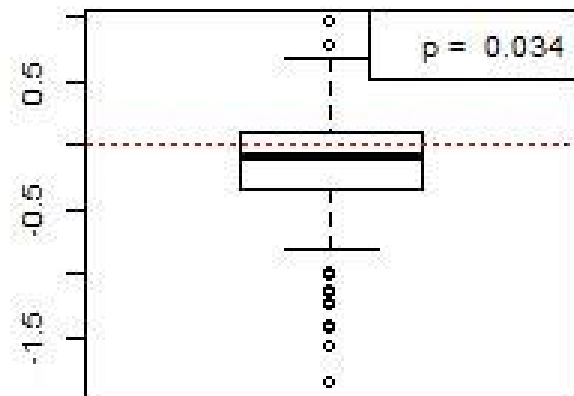

Supplement: gutjnl-2019-319630supp007.pdf [file gutjnl-2019-319630supp007.pdf]

**Eubacterium bifforme**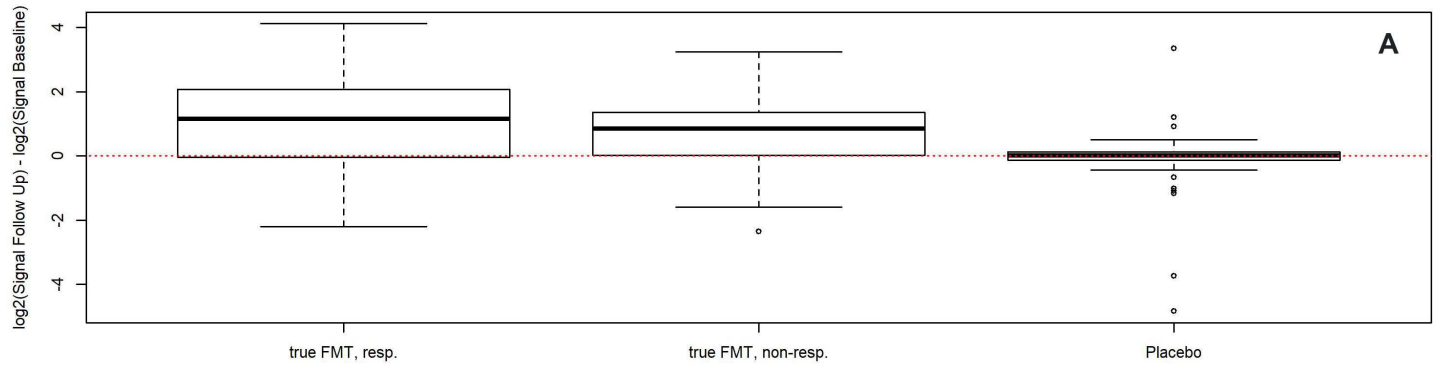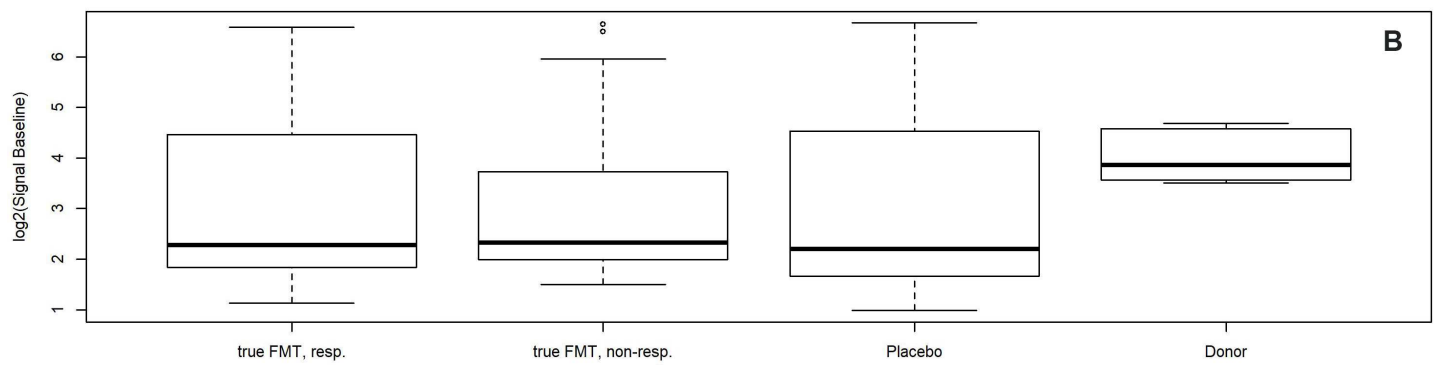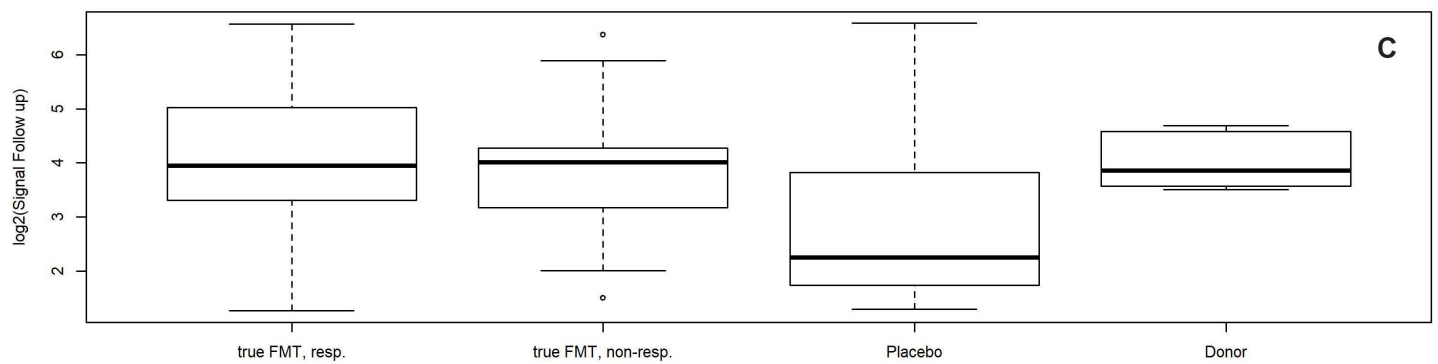

Supplement: gutjnl-2019-319630supp008.pdf [file gutjnl-2019-319630supp008.pdf]

## Lactobacillus spp.

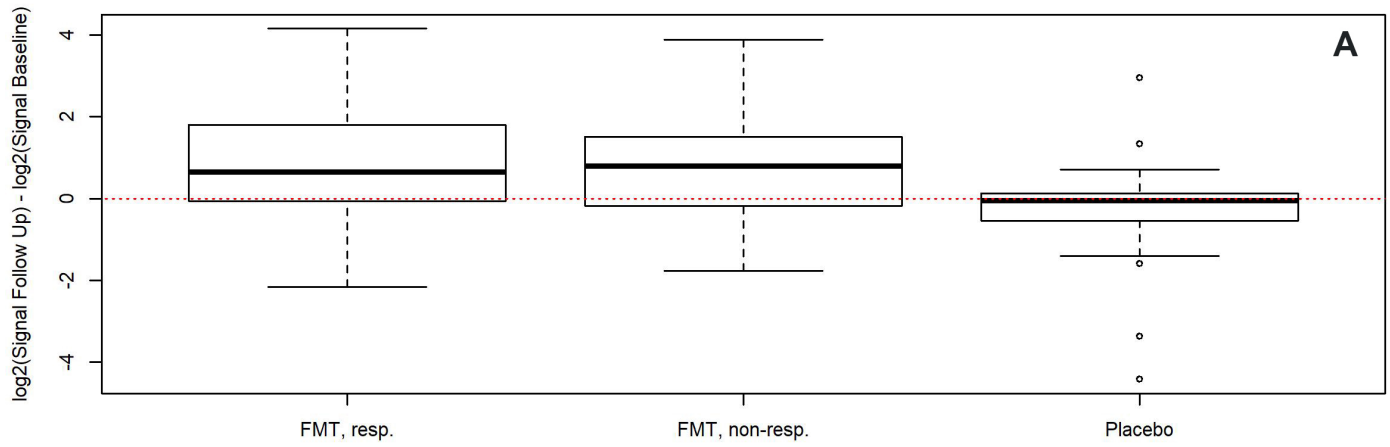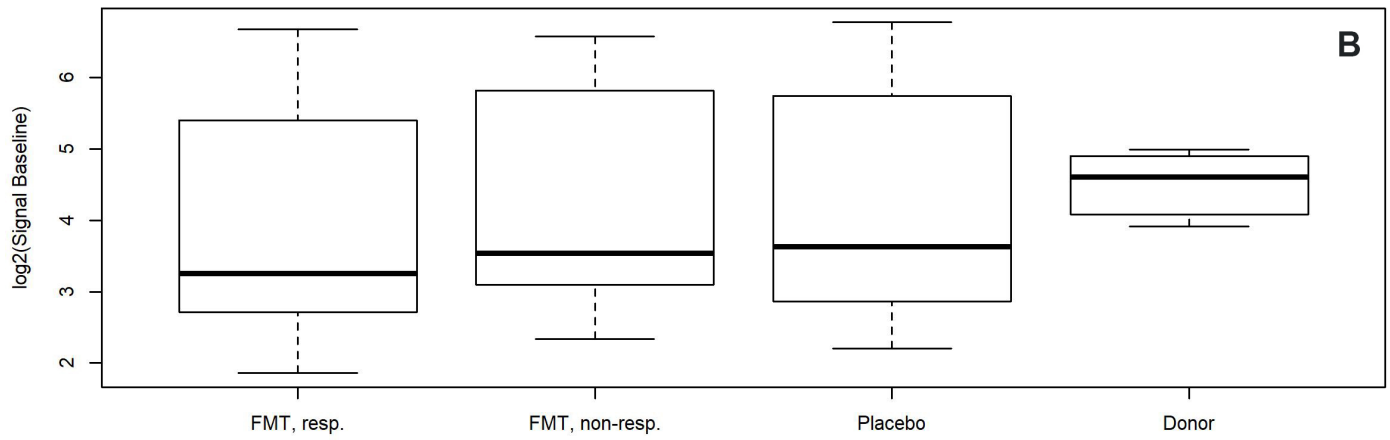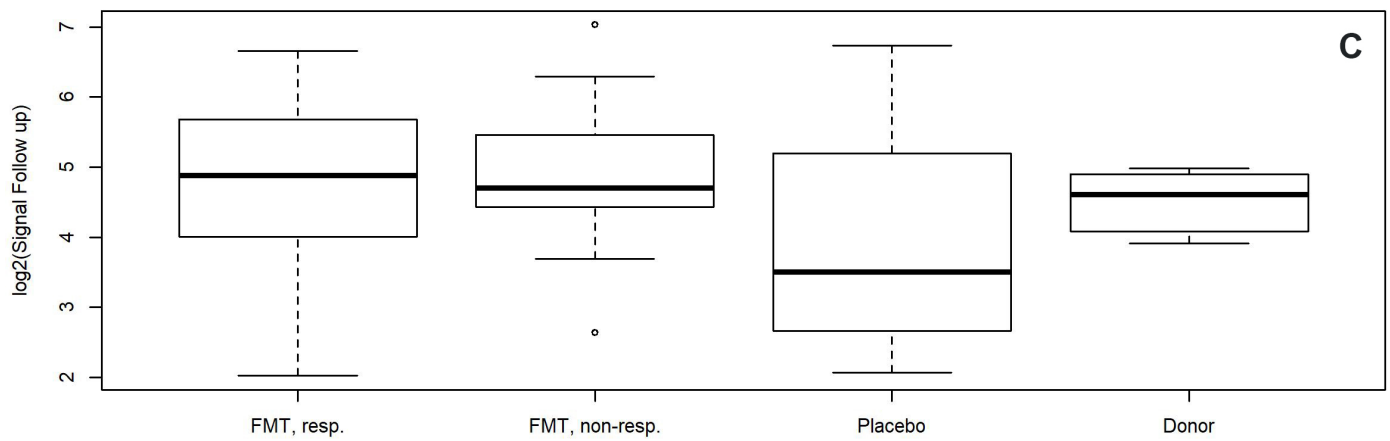

Supplement: gutjnl-2019-319630supp009.pdf [file gutjnl-2019-319630supp009.pdf]

## Alistipes

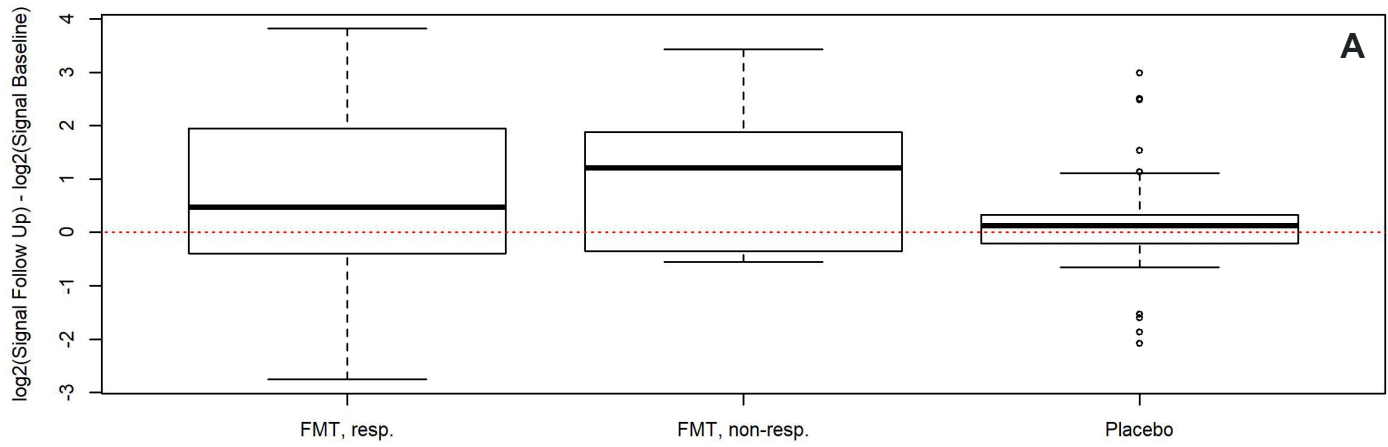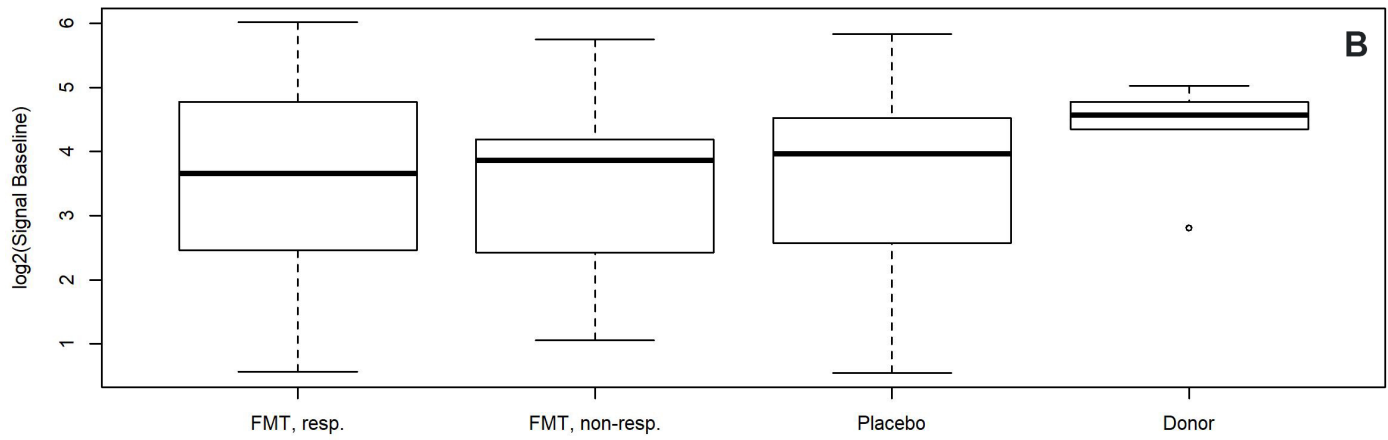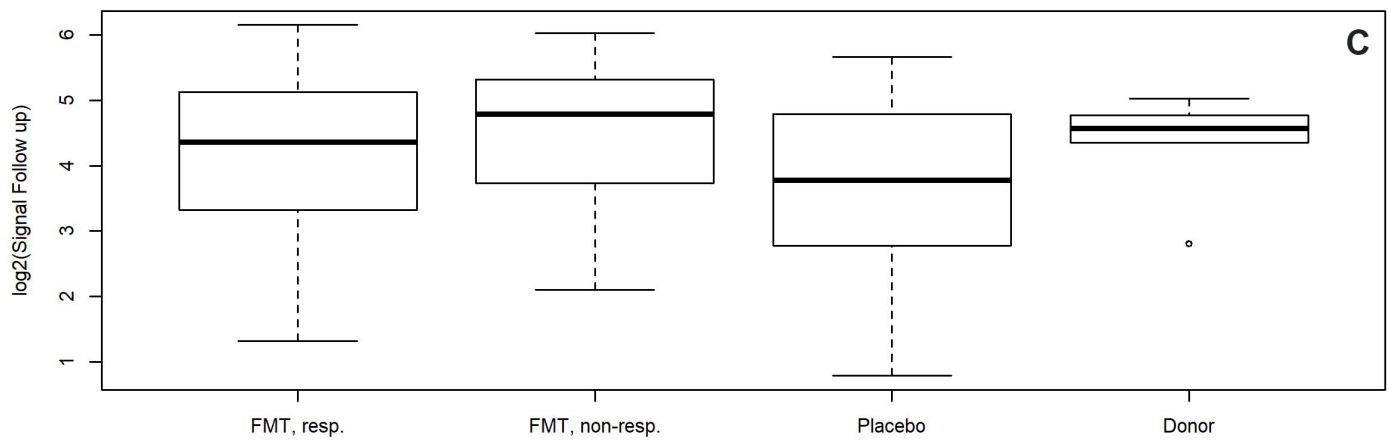

Supplement: gutjnl-2019-319630supp010.pdf [file gutjnl-2019-319630supp010.pdf]

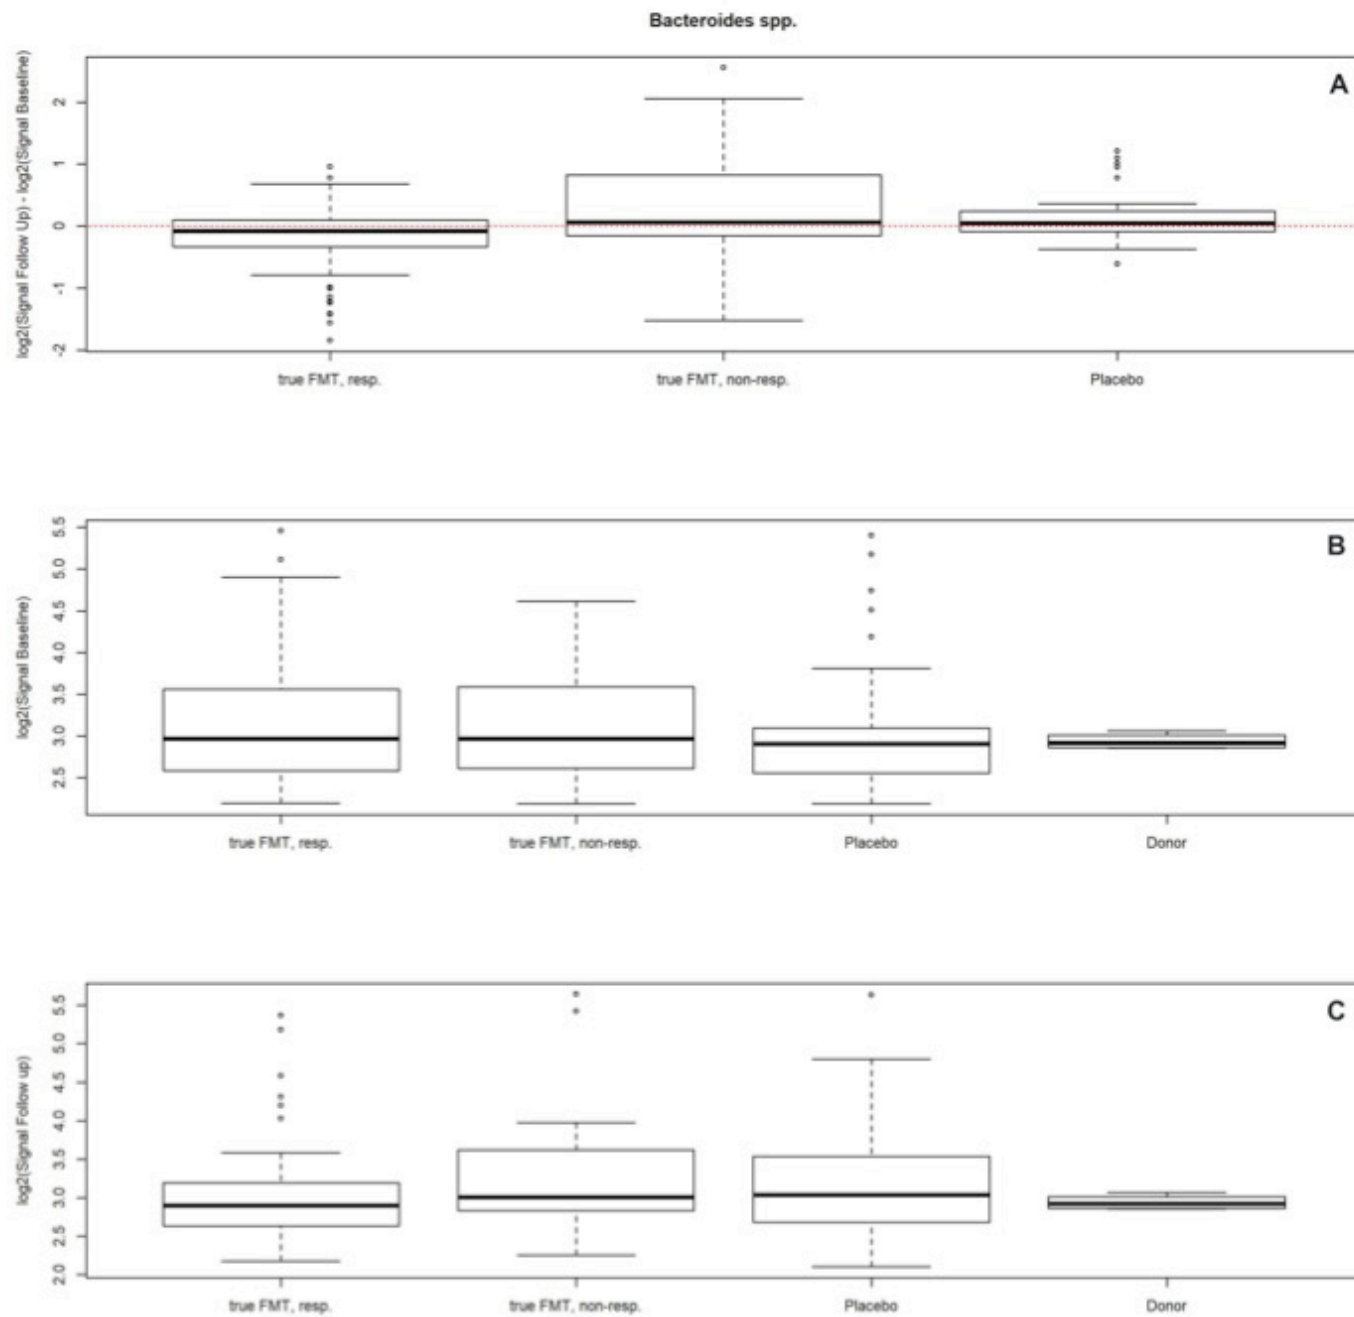

Supplement: gutjnl-2019-319630supp011.pdf [file gutjnl-2019-319630supp011.pdf]
